# Supplementary material for: In Search of Culturally Appropriate Autism Interventions: Perspectives of Latino Caregivers
Source: Springer Nature journal article supplement (doi:10.1007/s10803-017-3394-8), 2017-11-29
Supplement: MOESM1 [file 15267416]

**Focus group protocol**

Spanish version:

Primero, me gustaría pasar de persona en persona y escuchar un poco acerca de ustedes. Díganos: Su nombre ¿Cómo está relacionado a un niño que tiene o puede tener autismo?

Sección 1: experiencias de terapia actuales o anteriormente

Ahora, les pido que piensen en la terapia que su hijo está recibiendo ahora, o las terapias que ha recibido en el pasado.

1. Cómo están involucrados en las terapias de su hijo. O de ahora o de antes?

- ¿Qué papel/rol ha jugado/como ha participado en las terapias de su hijo?
  - Por ejemplo: compartir información acerca de su hijo con la terapeuta, escoger estrategias de terapia o actividades o comportamientos específicos de su niño para enfocarse con la terapeuta, aprobar objetivos del IEP o IFSP que el terapeuta ha creado, llevar a cabo las recomendaciones que el terapeuta le dio para hacer en casa, transportar al hijo a las terapias, etc.
- ¿Qué tan satisfechos han estado en la manera en que participan en las terapias?

* Si los padres mencionan una manera de estar involucrado con la terapia, podemos preguntar más sobre esto. Por ejemplo:

- ¿Puede describir esta(s) experiencia(s) más?

- ¿Cómo le gustó ser parte de la terapia de esta manera?

- ¿Qué sería una mejor manera de ser involucrado con la terapia?

* Si los padres mencionan que llevan a cabo recomendaciones del terapeuta en casa, diles que “vamos a hablar mucho de esto, entonces voy a regresar a este comentario en un minuto, ¿alguien más tiene algún comentario de sus roles en las terapias?”

Hace el resumen.

Gracias por esta información. La próxima pregunta es…

2. ¿Qué recomendaciones o ideas les han dado las terapeutas/maestros de su hijo para hacer con su hijo en casa, si hay? *No enfoques en las recomendaciones. En vez, haz estas preguntas para familias que tenían recomendaciones.

- ¿Qué tan fácil o difícil fue hacerlo – o saber que hacer o encontrar tiempo para hacerlo?
- ¿Qué tan apropiados eran estas ideas para su hijo o su familia/estilo de vida?
- ¿Qué ideas han encontrado más fáciles o más difíciles de usar en su casa/familia?

Hace el resumen.

Gracias por esta información. Vamos a pasar a la próxima sección.

Sección 2: Percepción de las intervenciones basadas en la evidencia

1. Las terapias pueden concentrarse en comportamientos diferentes de su hijo.

Piense en sus prioridades- los comportamientos y las habilidades que son más importantes para usted que su hijo aprenda– que quiere que su hijo aprenda?

¿Qué desea que su terapeuta enseñe a su hijo?

- (si no entienden la pregunta) Por ejemplo: Atención/contacto de los ojos; Habilidades de imitación; Desarrollo de la comunicación; Desarrollo del habla; La autorregulación (para dificultades sensoriales); Manejo de la conducta; Habilidades motoras; Seguir instrucciones

Hace el resumen

Gracias por esta información.

2. Ahora, voy a describir cuatro estrategias de enseñanza utilizadas en las diferentes terapias. Tengo descripciones y videos. Imagine que la terapeuta o usted están usando estas estrategias con su hijo. Díganme cómo cree que se sentiría usando estas estrategias con su hijo.

1. La primera estrategia es: ayuda específica:

Dar ayuda específica significa ayuda que permite que un niño pueda completar un comportamiento específico/tarea específica. Dar ayuda específica reduce las respuestas incorrectas mientras los niños adquieren habilidades nuevas, dándoles toda la ayuda que se necesita para realizar una tarea, y luego poco a poco, quitando la ayuda hasta que el niño pueda realizar la tarea de forma independiente.

1. Video 1: Ayuda física: La madre toca al niño para ayudarlo cuando piensa que él puede equivocarse. Ella usa eso para dejar que equivoque.

2. Ayuda con un gesto: Papá usa un gesto para mostrarle al niño donde va el pedazo del rompecabezas.

Se puede usar este ayuda específica para recordar al niño a **decir** algo, como mostrarle la seña de “mas” para recordarle a decir “mas.”

Entones, se puede usar esta ayuda específica en varias formas para asegurarse de que el niño tenga la información o el apoyo que necesite para lograr una actividad, y se quita esta ayuda poco a poco para que complete la actividad independientemente.

Ahora, díganme cómo creen que se sentirían ustedes usando esta ayuda específica con su hijo o si la terapeuta usara ayuda específica. *I’m more interested in the parents’ opinion of themselves using it.

- (Si no empiezan a responder, o para enfocarse si hablan de otras cosas)
  - ¿Qué tan fácil o difícil sería hacer en su hogar?
  - ¿Qué tan apropiado sería para usted y su hijo?
  - ¿Si usted o su terapeuta ha usado esta estrategia, qué fueron los pros y contras de usarla?

Hace el resumen.

Vamos a pasar a la próxima estrategia:

1. Modelar o Modelar Con video:

Modelar es cuando el niño observa a alguien realizar una tarea específica correctamente. Se espera que la demostración del comportamiento inmediatamente antes de hacerlo sirva para enseñar el comportamiento. Los modelos también se pueden mostrar a través del video, cuando el niño ve un video de la tarea o acción específica. Se puede modelar para dar más ayuda al niño después de se ha dado el mandato y el niño está tratando de hacer la tarea o acción.

3. Al principio aquí, el niño no sabe jugar con el juguete. Después, modelan como usarlo, y su tarea es imitarla a la mujer.

Se podría hacer eso con cualquier actividad, sea lavarse las manos, comer, o hablar. Pero funciona mejor si el niño ya tiene la habilidad física de hacer la actividad.

También se puede usar un video del modelo en vez de hacer el modelo en el momento.

4. Aquí, la madre le muestra un video de otro niño haciendo una actividad que quiere que haga.

5. Después, la madre le da el juguete, y ahora es más probable que vaya a hacerlo correctamente.

6. Aquí, dos niños ven el video y aprenden a tomar turnos.

Como dije, no es solamente para jugar. Se puede ensenar cosas diferentes con eso. Tomar turnos es un ejemplo, pero también tareas como lavar las manos, habilidades académicas como escribir, empujar la silla bajo la mesa, o aun comunicarse, como hablar o usar un sistema alternativa para comunicarse.

Ahora, díganme cómo creen que se sentirían ustedes modelando o modelando con videos con su hijo o si la terapeuta usara modelos. *I’m more interested in the parents’ opinion of themselves using it.

- (Si no empiezan a responder, o para enfocarse si hablan de otras cosas)
  - ¿Qué tan fácil o difícil sería hacer en su hogar?
  - ¿Qué tan apropiado sería para usted y su hijo?
  - ¿Si usted o su terapeuta ha usado esta estrategia, qué fueron los pros y contras de usarla?

Hace el resumen.

Vamos a pasar a la próxima estrategia:

1. La intervención naturalista:

Una colección de prácticas que incluyen organizar el ambiente, seguir el interés del niño, responder al interés del niño, e incorporar la enseñanza en las rutinas diarias. Estas prácticas están diseñadas para alentar comportamientos específicos basados en los intereses del niño para construir habilidades más complejas que se refuerzan de forma natural y apropiadas para la interacción.

7. Aquí, la mama juega algo, se nota que al niño ya no le interesa, se da cuenta que está mirando la luz, y entonces crea un juego interactivo con la luz.

A veces, se trata de esperar que el niño interactúe con usted o le pida algo. Entones se puede organizar o arreglar la actividad para que su niño necesite algo, y se espera hasta que lo pida.

8. Aquí, esperan hasta que el niño hace la seña “mas” con sus manos. Pero solamente le dan la bolsa cerrada porque ahora van a esperar hasta que pida ayuda para abrirla… Y usó la seña para “abrir.”

Ahora, díganme cómo creen que se sentirían ustedes usando estas estrategias naturalistas con su hijo o si la terapeuta las usara. *I’m more interested in the parents’ opinion of themselves using it.

- (Si no empiezan a responder, o para enfocarse si hablan de otras cosas)
  - ¿Qué tan fácil o difícil sería hacer en su hogar?
  - ¿Qué tan apropiado sería para usted y su hijo?
  - ¿Si usted o su terapeuta ha usado esta estrategia, qué fueron los pros y contras de usarla?

Hace el resumen.

Vamos a pasar a la próxima estrategia:

1. Pruebas discretas:

La enseñanza de pruebas discretas es un método de enseñanza uno-a-uno usado para enseñar habilidades de una manera planificada, controlada y sistemática utilizando pasos pequeños y repetidos. Cada oportunidad de prueba o enseñanza tiene un principio y un final definido. El maestro da una instrucción o señal para empezar un comportamiento, espera que el niño realice el comportamiento, y luego responde con una consecuencia o recompensa. Elogios y/o recompensas tangibles son utilizados para reforzar las habilidades o conductas deseadas.

Generalmente, el adulto maneja la interacción y el niño tiene que hacerle caso al adulto. Si hace lo que el adulto pida, recibe un premio. Si no, el adulto lo muestra cual es correcto.

9. Aquí, la mujer le dice que toque la taza. Lo hace, y recibe burbujas.

10. La mama hace pruebas discretas en casa. El niño debe nombrar el juguete que su mamá le muestra, y recibe su juguete favorito por hacerlo correctamente.

Entonces, con pruebas discretas, el niño tiene que aprender a prestar atención a lo que el adulto está haciendo y recibe premios (juguetes, comida, actividades favoritas) por escuchar y seguir direcciones.

Ahora, díganme cómo creen que se sentirían ustedes usando pruebas discretas con su hijo o si la terapeuta las usara. *I’m more interested in the parents’ opinion of themselves using it.

- (Si no empiezan a responder, o para enfocarse si hablan de otras cosas)
  - ¿Qué tan fácil o difícil sería hacer en su hogar?
  - ¿Qué tan apropiado sería para usted y su hijo?
  - ¿Si usted o su terapeuta ha usado esta estrategia, qué fueron los pros y contras de usarla?

¿Qué práctica, de estas, les parece más fácil o más difícil usar con su hijo en casa?

¿Si su terapeuta le ofreciera todas estas estrategias, cual elegiría para usar en casa, y por qué?

Hace el resumen.

Gracias por toda esta información. Ahora vamos a para a la próxima sección.

Sección 3: Las percepciones de los componentes de las terapias

Ahora, voy a hacer unas preguntas sobre diferentes tipos de terapia.

1. Primero, la terapia puede ser administrada en diferentes formas, las personas involucradas tomando roles diferentes. Por ejemplo:

- Entrenamiento de los Padres (Cuando la terapeuta solamente da instrucciones directamente a los padres sobre cómo trabajar con su hijo.)
- Directamente con la terapeuta (Cuando la terapeuta solamente trabaja directamente con el niño.)
- O ambos (Cuando se dividen las horas entre los dos tipos, o la terapeuta trabaja con el niño mientras enseña a los padres)

Que son sus experiencias u opiniones en cuanto a lo posible, apropiado o aceptable que sean estas formas para su familia y estilo de vida, o que formas no serían apropiados para su familia.

Hace el resumen.

2. Entre los tipos de terapia con entrenamiento de padres, hay muchos formatos y estrategias de enseñanza.

Primero, formato de instrucción: Por ejemplo: La instrucción individual (con un padre y un terapeuta), instrucción en grupo (con varios padres y un maestro), o ambos (individual y grupo).

- - (Si no hablan,)
    - comparta con nosotras sus experiencias u opiniones de estos formatos– en grupo o individualmente.
    - cuanto posible, apropiado o aceptable seria en grupo o individualmente para su familia y estilo de vida

Hace el resumen

Y ahora, hablemos de los miembros de la familia que están involucrados: Por ejemplo: la madre solamente, ambos padres, otros miembros de la familia

- - (Si no hablan,)
    - comparta con nosotras sus experiencias u opiniones de quien debe ser parte de la terapia.
    - cuanto posible, apropiado o aceptable seria tener diferentes miembros de la familia para su familia y estilo de vida

Hace el resumen final

English translation

*Note: this translation was not used during focus groups, it is only presented here for readers of the article.

First, I’d like to go around the room and hear a little bit about you. Tell us: Your first name. How you are related to a young child receiving intervention for autism or possible autism, and how old the child is.

Section 1: Current or past intervention experiences

Introduction: “First, I ask you to think about what intervention or therapy your child is receiving now, or what he or she has received in the past.”

1. How are you involved in intervention(s) your child is receiving now or how you were involved in interventions he/she has received in the past.

- What roles have you played in your child’s interventions? (Ex: sharing information about your child with the therapist, choosing therapy strategies, activities, or specific behaviors to work on with the therapist, approving IEP or ISFP goals that the therapist has come up with, carrying out recommendations that the therapist has given to you to do at home, transporting your child to therapies, etc.)
- How satisfied have you been with your level of involvement in your child’s interventions or the roles you have played?

* If parents mention a way they are involved in therapy, we can ask more about that. For example: Can you describe that experience more? How did you like being involved in that way? What would be a better way to be involved in therapy?

*If parents mention that they carry out therapy recommendations at home, tell them “we’re going to talk a lot about that, so I’m going to come back to that comment in a minute. Does anyone have any other comments about their roles in therapy?”

2. What recommendations or ideas, if any, has your child’s therapists/teachers given you to help your child when the therapist/teacher is not there? *Don’t focus on the recommendations. Instead, ask these questions to parents that had recommendations.

- How appropriate were these ideas for your child or your household/lifestyle?
- How challenging was it for you or your families to use these recommendations?
- What ideas did you find to be easier or harder to use in your household?

*Summary

Thank you for that information.

Section 2: Perceptions of evidence-based interventions

Interventions can focus on teaching different behaviors to your child. Think about what your priorities are for what you want to help your child learn. Also, different intervention programs have different ways of teaching your child the chosen behaviors. Think about how you prefer to teach your child or how you prefer your child to be taught.

1. What do you want your therapist to help teach your child? Think about what behaviors and skills are most important to you for your child to learn.

- (if they don’t understand the question) For example: Joint attention/eye contact; Imitation skills; Communication development; Speech development; Self-regulation (for sensory difficulties); Behavior management; Motor skills; Following directions

*Summary

Thank you for that information.

2. Now, I’m going to describe several teaching strategies used in different interventions. Imagine that the therapist is teaching you to use these strategies. Tell me how you think you would feel about using these strategies with your child. (Follow-up questions: How easy or hard would these be to do in your household? How appropriate would these strategies be for you and your child?)

1. Prompting:

Prompting includes any help given to a child that assists him/her in using a specific skill or behavior. Prompting reduces incorrect responding as children acquire new skills by giving them as much help as is needed to perform a task, and then gradually taking away the help until the child can perform the task independently.

1. Video 1: Physical prompts: The mother touches the child to help him when she thinks that he might make a mistake. She uses this to keep him from making a mistake.
2. Video 2: Gestural prompts: Dad uses a gestures to show the child where the puzzle piece goes.

You can use prompting to remind the child to **say** something, like showing a sign for “more” to remind him to say “more.”

So, you can use prompting in various forms to make sure that the child has the information or the support needed to complete an activity, and take away the prompts little by little so he completes the activity independently.

Now, tell me how you think you would feel using prompting with your child or if the therapist used prompting. **I’m more interested in the parents’ opinion of themselves using it.*

- - If they don’t start responding, or to focus them if they talk about other things
    - How easy or hard would it be to do in your home?
    - How appropriate would it be for you and your child?
    - If you or your therapist has used this strategy, what were the pros and cons to using it?

*Summary
We’re going to move to the next strategy.

1. Modeling/video modeling:

Modeling involves the child observing someone correctly performing a target behavior. The demonstration of the behavior before the child is expected to demonstrate the behavior serves as a primer for the behavior. Modeling can be used as a prompt in order to provide extra support to the child after the direction has been provided and the child is trying to use the behavior. Models can also be shown through video, where the child watches a video of the target behavior.

1. Video 3: At the beginning here, the child doesn’t know how to play with the toy. Then, they model how to use it, and his job is to imitate the woman.

You could do with this any activity, like washing hands, eating, or speaking. But it works better if the child already has the physical ability to do the activity.

You can also use a video of the model instead of doing the model in the moment.

1. Video 4: Here, the mother shows the child a video of another child doing an activity that she wants him to do.
2. Video 5: After, the mother gives him the toy, and how it’s more likely that he’ll do it correctly.
3. Video 6: Here, two kids watch the video and learn to take turns.

As I said, it’s not just for playing. You can teach different things with this. Taking turns is one example. But also tasks like washing hands, academic abilities like writing, pushing a chair under the table, or even communicate, like speaking or using an alternative system to communicate.

Now, tell me how you think you would feel modeling or video modeling with your child or if the therapist used prompting. **I’m more interested in the parents’ opinion of themselves using it.*

- - If they don’t start responding, or to focus them if they talk about other things
    - How easy or hard would it be to do in your home?
    - How appropriate would it be for you and your child?
    - If you or your therapist has used this strategy, what were the pros and cons to using it?

*Summary
We’re going to move to the next strategy.

1. Naturalistic intervention:

A collection of practices including arranging the environment, following the child’s lead, responding to the child’s focus of interest, and embedding teaching time into daily routines. These practices are designed to encourage specific target behaviors based on the child’s interests by building more complex skills that are naturally reinforcing and appropriate to the interaction.

1. Video 7: Here, the mom is playing something, you see that the child isn’t interested anymore, she realizes he’s looking at the light, and so she creates an interactive game with the light.

Sometimes, it involves waiting for the child to interact with you or ask you for something. So you can organize or arrange the activity so that your child needs something, and wait until he asks you for it.

1. Video 8: Here, they wait until the child makes the sign “more” with his hands.

But they only give him the closed bag because now they’re going to wait until he asks for help to open it… And he used the sign for “open.”

Now, tell me how you think you would feel using these naturalistic strategies with your child or if the therapist used prompting. **I’m more interested in the parents’ opinion of themselves using it.*

- - If they don’t start responding, or to focus them if they talk about other things
    - How easy or hard would it be to do in your home?
    - How appropriate would it be for you and your child?
    - If you or your therapist has used this strategy, what were the pros and cons to using it?
- *Summary
  We’re going to move to the next strategy.

1. Discrete trials:

Discrete trial training is a one-to-one instructional approach used to teach skills in a planned, controlled, and systematic manner using small, repeated steps. Each trial or teaching opportunity has a definite beginning and end. The teacher gives an antecedent (instruction or cue for a behavior to start), waits for the child to perform the behavior, and then responds with a consequence/reward. Positive praise and/or tangible rewards are used to reinforce desired skills or behaviors.

Generally, the adult manages the interaction and the child has to do what the adult says. If they do what the adult asks, the get a prize. If not, the adult shows them what is right.

1. Video 9: Here, the woman tells him to touch the cup. He does it, and he gets bubbles.
2. Video 10: The mother is using discrete trials at home. The child is supposed to name the toy that his mom shows him, and he gets his favorite toy for doing it correctly.

So, with discrete trials, the child has to learn to pay attention to what the adult is doing and they get prizes (toys, food, favorite activities) for listening and following directions.

Now, tell me how you think you would feel using discrete trials with your child or if the therapist used prompting. **I’m more interested in the parents’ opinion of themselves using it.*

- - If they don’t start responding, or to focus them if they talk about other things
    - How easy or hard would it be to do in your home?
    - How appropriate would it be for you and your child?
    - If you or your therapist has used this strategy, what were the pros and cons to using it?

Which practice, of these, seems like the easiest or hardest to you to use with your child at home?

If your therapist offered you all these strategies, which would you choose to use at home, and why?

Summary

Thanks for all that information. Now we’re going to move on to the next section.

Section 3: Perceptions of components of interventions

For this section, I’m going to ask about different types of intervention

1. First, intervention can be delivered in different ways, with people involved taking different roles.

- Parent-training (The therapist gives instruction directly to the parent on how to work with their child.)
- Direct with the therapist (The therapist works directly with the child only.)
- Or both (Services hours are split between the two types/the therapist works with the child while teaching the parent/etc.)

What are your experiences or opinions as far as which styles would be most feasible, appropriate, or acceptable for your family and lifestyle, or which styles would NOT be appropriate for your family.

*Summary

2. Among intervention models with a parent-training component, many different formats and teaching strategies are possible.

- First, format of instruction: (For example: Individual instruction (with one parent and one therapist), Group instruction (with several parents and one teacher), or both individual and group instruction)
- If they don’t speak: Share with us your experiences or opinions about these formats – in group or individual.
  - How feasible, appropriate, or acceptable would group or individual be for your family and lifestyle

*Summary

Now, let’s talk about family members that are involved: (For example: Mother only, both parents, extended family members)

- If they don’t speak: Share with us your experiences or opinions about who should be part of therapy.
  - How feasible, appropriate, or acceptable would having different family members be for your family and lifestyle

*Final summary
